# Supplementary material
Source: PubMed Central journal article supplement (PMC2579797)
Supplement: NIHMS75956-supplement-Text.pdf [file NIHMS75956-supplement-Text.pdf]

## Materials and Methods

**Macrophages and foam cells:** Mixed peripheral blood mononuclear cells (PBMCs) were isolated by Histopaque 1.077 (Sigma Diagnostics, St. Louis, MO) and washed twice with PBS containing 0.02% EDTA (Sigma Diagnostics, St. Louis, MO). Subsequently, monocytes were isolated using a negative selection monocyte isolation kit and LS columns (both Miltenyi Biotec, Bergisch Gladbach, Germany). The purity of monocytes was >97% as determined by flow cytometry using anti-CD14 antibody (Figure S1A).

Monocytes were cultured in Macrophage Serum-Free Medium (Invitrogen, Carlsbad, CA) in the presence of 1% media supplement nutridoma-SP (Roche Molecular Biochemicals, Indianapolis, IN), penicillin (100 u/mL), streptomycin (1 mg/mL, both Sigma Diagnostics, St. Louis, MO) and macrophage colony-stimulating factor (M-CSF) or CXCL4 (100 ng/mL, both Peprotech, Rocky Hill, NJ) for 6 days. This standard macrophage cell culture medium has a final glucose concentration of 17.5 mM. Macrophages were then incubated with minimally modified LDL (mmLDL, a kind gift from Joseph Witztum, San Diego, CA) or oxidized LDL (oxLDL, Biomedical Technologies, Stoughton, MA) at a concentration of 100  $\mu$ g/mL for up to 48 hours to induce foam cell formation. Controls were incubated with medium only.

Foam cell formation was verified by oil red O staining. Therefore, cells were fixed in 1 % paraformaldehyde over night at 4°C. Cells were then washed twice with PBS and incubated with 70% isopropanol for 2 minutes. Oil red O staining was performed with 0.5%

oil red O (Sigma Diagnostics, St. Louis, MO) in 60% isopropanol for 10 minutes followed by counterstaining with Mayer's hematoxylin (Sigma Diagnostics, St. Louis, MO) for 5 minutes (Figure S1B).

For experiments under normo- and hyperglycemic conditions, cells were cultured in glucose-deficient medium (glucose-free RPMI 1640 (Invitrogen, Carlsbad, CA) +10% dialyzed FCS (HyClone, Logan, UT)) supplemented with either 30 mM D-glucose or 5 mM D-glucose plus 25 mM L-glucose as osmotic control (both Sigma, St. Louis, MO).

***Aldose reductase activity assay:*** Aldose reductase enzyme activity was measured spectrophotometrically by determination of the decrease in absorbance at 340 nm in absence and presence of glyceraldehyde as substrate reflecting the consumption of NADPH<sup>1-3</sup> in either cell lysates or cell culture supernatants<sup>2</sup>. The total assay volume of 1000  $\mu$ l contained 730  $\mu$ l sodium phosphate buffer (100 mM, pH 7.0), 50  $\mu$ l NADPH (1.6 mM, both Sigma Diagnostics, St. Louis, MO), 20  $\mu$ l diphenylhydantoin (10 mM), and 100  $\mu$ l of enzyme solution. To start the reaction, 10  $\mu$ l DL-glyceraldehyde (100 mM, Sigma Diagnostics, St. Louis, MO) were added and the absorption at 340 nm was measured at 25°C for 3 minutes. Glyceraldehyde was dedimerized for 10 mins at 85°C before assay. Diphenylhydantoin was added to inhibit unspecific metabolization of glyceraldehydes by aldehyde dehydrogenase. Absorbance values were corrected for blanks containing all components of the reaction except the substrate. AR activity was normalized to protein content as measured photometrically<sup>4</sup> and expressed in mU/ $\mu$ g (nmol NADPH oxidized per minute per  $\mu$ g protein).

***Oxidative stress assay:*** Macrophages were exposed to 100 µg/mL oxLDL for 48 hours, with or without pre-treatment with 0.2 µM epalrestat for 24 hours. Cells were then washed with PBS and incubated with 2',7'-dichlorofluoresceine diacetate (H<sub>2</sub>DCFDA, 10 µM, Invitrogen, Carlsbad, CA) at 37°C for 30 minutes. After an additional wash step with PBS, cells were harvested by scraping and fluorescence was assessed using a FACS Calibur instrument (BD Biosciences, Franklin Lakes, NJ). Results were expressed as fold change of geometric means over unstimulated cells

***Immunohistochemistry:*** Five µm paraffin sections of coronary arteries were used. Following heat induced antigen retrieval using antigen unmasking solution (Vector Laboratories, Burlingame, CA) tissue sections were either incubated with antibodies against aldose reductase (a kind gift from Dr. Aruni Bhatnagar, University of Kentucky, Louisville, KY; for later experiments SC-17732, Santa Cruz Biotechnology, Santa Cruz, CA), CD 68 (clone KP-1, Santa Cruz Biotechnology, Santa Cruz, CA) or α-smooth muscle actin (clone alpha sm-1, Novocastra Laboratories, Norwell, MA). Antibodies were detected using the ABC method (Vector Laboratories). Antibodies were visualized using DAB (DAKO corporation, Carpinteria, CA). Sections were then counterstained with hematoxylin (Richard-Allan Scientific, Kalamazoo, MI). Sections were analyzed for light microscopy using an Olympus BX51 microscope and Image Pro Plus 3.0 software (Media Cybernetics, Silver Spring, MD).

For fluorescence microscopy was performed after heat induced antigen retrieval using antigen unmasking solution. Sections were co-incubated with either antibodies against

aldose reductase (SC-17732) and CD68-Alex Fluor-488 (clone KP-1, both Santa Cruz Biotechnology, Santa Cruz, CA) or aldose reductase and smooth muscle  $\alpha$ -actin-Cy3 conjugated (clone IA-4, Sigma Diagnostics, St. Louis, MO). For CD68 and aldose reductase, aldose reductase was detected using donkey anti-Goat Alexa Fluor 555 (Molecular Probes, Carlsbad, CA). For SMA and aldose reductase, AR was detected using Donkey anti-Goat Alexa Fluor 488 (Molecular Probes, Carlsbad, CA). All slides were coverslipped using Vector Shield Hardset with DAPI (Vector Laboratories, Burlingame, CA). Sections were analyzed by fluorescence microscopy (Olympus BX51 microscope) and Image Pro Plus 3.0 software (Media Cybernetics, Silver Spring, MD).

For quantification of AR positive macrophages in atherosclerotic plaques and adventitia AR positive and CD68 positive cells were counted in at least four fields of vision at a magnification of 400X and the proportion of AR positive cells out of CD68 positive cells was calculated.

***Statistical analysis of gene arrays:*** The exact details of gene array data analysis have been described previously <sup>5</sup>. Briefly, after exclusion of internal controls, gene expression was normalized and log-transformed. The local pooled error (LPE) test for differential expression discovery under two conditions and the heterogeneous error model (HEM) for differential expression discovery under multiple conditions <sup>6</sup> were applied using the open-source statistical software R ([www.r-project.com](http://www.r-project.com)).

**Supplementary tables**

**Table S1:** Genes most strongly up- or downregulated by oxLDL in monocyte-derived macrophages. Given are Affymetrix H133A gene chip probe set ID, gene symbols, gene titles, false discovery rate (FDR) and fold change in oxLDL versus untreated cells in macrophages generated with either MCSF or CXCL4.

| <b>Probe set ID</b>                              | <b>Gene Symbol</b> | <b>Gene Title</b>                                                                                            | <b>FDR</b> | <b>Fold change MCSF</b> | <b>Fold change CXCL4</b> |
|--------------------------------------------------|--------------------|--------------------------------------------------------------------------------------------------------------|------------|-------------------------|--------------------------|
| <b>Cytokines, chemokines and their receptors</b> |                    |                                                                                                              |            |                         |                          |
| 207533_at                                        | CCL1               | chemokine (C-C motif) ligand 1                                                                               | <0.001     | 0.34                    | 0.04                     |
| 204103_at                                        | CCL4               | chemokine (C-C motif) ligand 4                                                                               | 0.028      | 0.54                    | 0.57                     |
| 212659_s_at                                      | IL1RN              | interleukin 1 receptor antagonist                                                                            | 0.009      | 2.02                    | 2.56                     |
| 216243_s_at                                      | IL1RN              | interleukin 1 receptor antagonist                                                                            | 0.015      | 1.94                    | 1.79                     |
| 212657_s_at                                      | IL1RN              | interleukin 1 receptor antagonist                                                                            | 0.009      | 1.92                    | 1.84                     |
| 206975_at                                        | LTA                | lymphotoxin alpha (TNF superfamily, member 1)                                                                | 0.015      | 0.17                    | 0.04                     |
| 207339_s_at                                      | LTB                | lymphotoxin beta (TNF superfamily, member 3)                                                                 | <0.001     | 0.37                    | 0.13                     |
| 218856_at                                        | TNFRSF21           | tumor necrosis factor receptor superfamily, member 21                                                        | <0.001     | 4.22                    | 3.22                     |
| 214228_x_at                                      | TNFRSF4            | tumor necrosis factor receptor superfamily, member 4                                                         | 0.009      | 0.43                    | 0.31                     |
| 207426_s_at                                      | TNFSF4             | tumor necrosis factor (ligand) superfamily, member 4 (tax-transcriptionally activated glycoprotein 1, 34kDa) | 0.021      | 0.45                    | 0.26                     |
| 206508_at                                        | TNFSF7             | tumor necrosis factor (ligand) superfamily, member 7                                                         | 0.009      | 0.41                    | 0.45                     |
| 206365_at                                        | XCL1               | chemokine (C motif) ligand 1                                                                                 | <0.001     | 0.41                    | 0.36                     |

|                                          |        |                                                                          |        |      |      |
|------------------------------------------|--------|--------------------------------------------------------------------------|--------|------|------|
| 206366_x_at                              | XCL1   | chemokine (C motif)<br>ligand 1                                          | <0.001 | 0.37 | 0.17 |
| <b>Genes related to lipid metabolism</b> |        |                                                                          |        |      |      |
| 203504_s_at                              | ABCA1  | ATP-binding cassette, sub-<br>family A (ABC1), member<br>1               | <0.001 | 2.37 | 1.71 |
| 203505_at                                | ABCA1  | ATP-binding cassette, sub-<br>family A (ABC1), member<br>1               | <0.001 | 2.21 | 2.62 |
| 204567_s_at                              | ABCG1  | ATP-binding cassette, sub-<br>family G (WHITE), mem-<br>ber 1            | <0.001 | 2.79 | 2.73 |
| 211113_s_at                              | ABCG1  | ATP-binding cassette, sub-<br>family G (WHITE), mem-<br>ber 1            | <0.001 | 2.78 | 2.66 |
| 209122_at                                | ADFP   | adipose differentiation-<br>related protein                              | <0.001 | 2.28 | 3.60 |
| 213553_x_at                              | APOC1  | apolipoprotein C-I                                                       | <0.001 | 2.92 | 1.79 |
| 208964_s_at                              | FADS1  | fatty acid desaturase 1                                                  | 0.009  | 0.45 | 1.00 |
| 208962_s_at                              | FADS1  | fatty acid desaturase 1                                                  | <0.001 | 0.30 | 1.18 |
| 208963_x_at                              | FADS1  | fatty acid desaturase 1                                                  | <0.001 | 0.21 | 0.69 |
| 202218_s_at                              | FADS2  | fatty acid desaturase 2                                                  | <0.001 | 0.21 | 0.44 |
| 202539_s_at                              | HMGCR  | 3-hydroxy-3-<br>methylglutaryl-Coenzyme<br>A reductase                   | <0.001 | 0.23 | 0.31 |
| 202540_s_at                              | HMGCR  | 3-hydroxy-3-<br>methylglutaryl-Coenzyme<br>A reductase                   | <0.001 | 0.17 | 0.29 |
| 221750_at                                | HMGCS1 | 3-hydroxy-3-<br>methylglutaryl-Coenzyme<br>A synthase 1 (soluble)        | <0.001 | 0.27 | 0.31 |
| 202068_s_at                              | LDLR   | low density lipoprotein<br>receptor (familial hyper-<br>cholesterolemia) | <0.001 | 0.15 | 0.46 |
| 202067_s_at                              | LDLR   | low density lipoprotein<br>receptor (familial hyper-<br>cholesterolemia) | <0.001 | 0.05 | 0.18 |
| <b>Genes related to oxidative stress</b> |        |                                                                          |        |      |      |
| 212859_x_at                              | MT1E   | metallothionein 1E (func-<br>tional)                                     | <0.001 | 3.73 | 3.32 |
| 217165_x_at                              | MT1F   | metallothionein 1F (func-<br>tional)                                     | <0.001 | 4.51 | 4.37 |
| 213629_x_at                              | MT1F   | metallothionein 1F (func-<br>tional)                                     | <0.001 | 4.24 | 3.89 |
| 204745_x_at                              | MT1G   | metallothionein 1G                                                       | <0.001 | 5.07 | 5.37 |
| 206461_x_at                              | MT1H   | metallothionein 1H                                                       | <0.001 | 4.99 | 4.10 |

|             |       |                    |        |       |       |
|-------------|-------|--------------------|--------|-------|-------|
| 211456_x_at | MT1H  | metallothionein 1H | <0.001 | 3.68  | 3.50  |
| 217546_at   | MT1K  | metallothionein 1K | 0.009  | 21.34 | 11.19 |
| 204326_x_at | MT1L  | metallothionein 1L | <0.001 | 5.58  | 6.16  |
| 208581_x_at | MT1X  | metallothionein 1X | <0.001 | 3.22  | 3.15  |
| 212185_x_at | MT2A  | metallothionein 2A | <0.001 | 2.75  | 2.68  |
| 216609_at   | TXN   | thioredoxin        | <0.001 | 2.84  | 2.44  |
| 214205_x_at | TXNL2 | thioredoxin-like 2 | <0.001 | 2.49  | 2.53  |

**Supplementary figures****Figure S1:**

(A) Purity of monocytes obtained by negative isolation as determined by FACS staining for CD14. Forward side scatter (FSC – SSC) plot as well as histogram for FL1 are shown.

(B) Foam cell formation after exposure of monocyte-derived macrophages to oxLDL (100 µg/ml) for 48 hours as determined by oil-O-red staining. Controls were treated with medium for 48 hours.

**Figure S2:**

(A) AR gene expression in PBMC, monocytes, macrophages and foam cells. PBMC were isolated from healthy donors by gradient, monocytes by negative bead isolation. Macrophages were generated either by six days treatment with M-CSF or CXCL4, cells were then incubated with medium, mmLDL or oxLDL (100 µg/mL each) for an additional two days as indicated. Gene expression was determined by Affymetrix gene chip analysis.

(means+SEM, \* P<0.05, \*\*\* P<0.0001)

(B) Time course of AR gene expression during foam cell formation from macrophages generated with CXCL4 for 6 days. Cells were exposed to oxLDL (100 µg/mL) for 0, 2, 4, 6, 12, 24, and 48 hours (means±SEM, \*\*\* P<0.001 versus unstimulated)

(C) AR activity as determined by photometrically measuring NADPH consumption at 340 nm in monocyte-derived macrophages (6 days CXCL4) with and without exposure to oxLDL (100 µg/mL) for two days (means+SEM, \*\* P<0.01, \* P<0.05)



**Figure S3:**

Gene expression of the pro-inflammatory mediators (A) TNF $\alpha$  (TNFA), (B) IL-6 (IL6), and (C) IL-1 $\beta$  (IL1B) during foam cell formation. Macrophages generated with M-CSF were exposed to vehicle (unst.) or 100  $\mu$ g/ml oxLDL for 48 hours and gene expression was determined by Affymetrix gene array.

**Figure S4:** Proportion of AR positive macrophages in plaque and adventitia in seven different donors (n.d. = not determined).

**References**

1. Wermuth B, von Wartburg JP. Aldose reductase from human tissues. *Methods Enzymol.* 1982; 89:181-186.
2. Nishimura C, Matsuura Y, Kokai Y, Akera T, Carper D, Morjana N, Lyons C, Flynn TG. Cloning and expression of human aldose reductase. *J Biol Chem.* 1990; 265:9788-9792.
3. Spycher SE, Tabataba-Vakili S, O'Donnell VB, Palomba L, Azzi A. Aldose reductase induction: A novel response to oxidative stress of smooth muscle cells. *FASEB J.* 1997; 11:181-188.
4. Layne E. Spectrophotometric and turbidimetric methods for measuring proteins. *Methods enzymol.* 1957:447-454.
5. Cho HJ, Shashkin P, Gleissner CA, Dunson D, Jain N, Lee JK, Miller Y, Ley K. Induction of dendritic cell-like phenotype in macrophages during foam cell formation. *Physiol Genomics.* 2007; 29:149-160.
6. Cho H, Lee JK. Bayesian hierarchical error model for analysis of gene expression data. *Bioinformatics.* 2004; 20:2016-2025.
